# Supplementary material for: Spatial control of nucleoporin condensation by fragile X‐related proteins
Source: PubMed Central journal article supplement — EMBO J. 2020 Jul 24;39(20):e104467. doi: 10.15252/embj.2020104467 (PMC7560220; doi:10.15252/embj.2020104467), 2020-07-24

Figure 1A: Lysates of HeLa cells stably expressing GFP alone or GFP-FXR1 were subjected to immunoprecipitation using GFP-Trap beads (GFP-IP) and analysed by Western blot

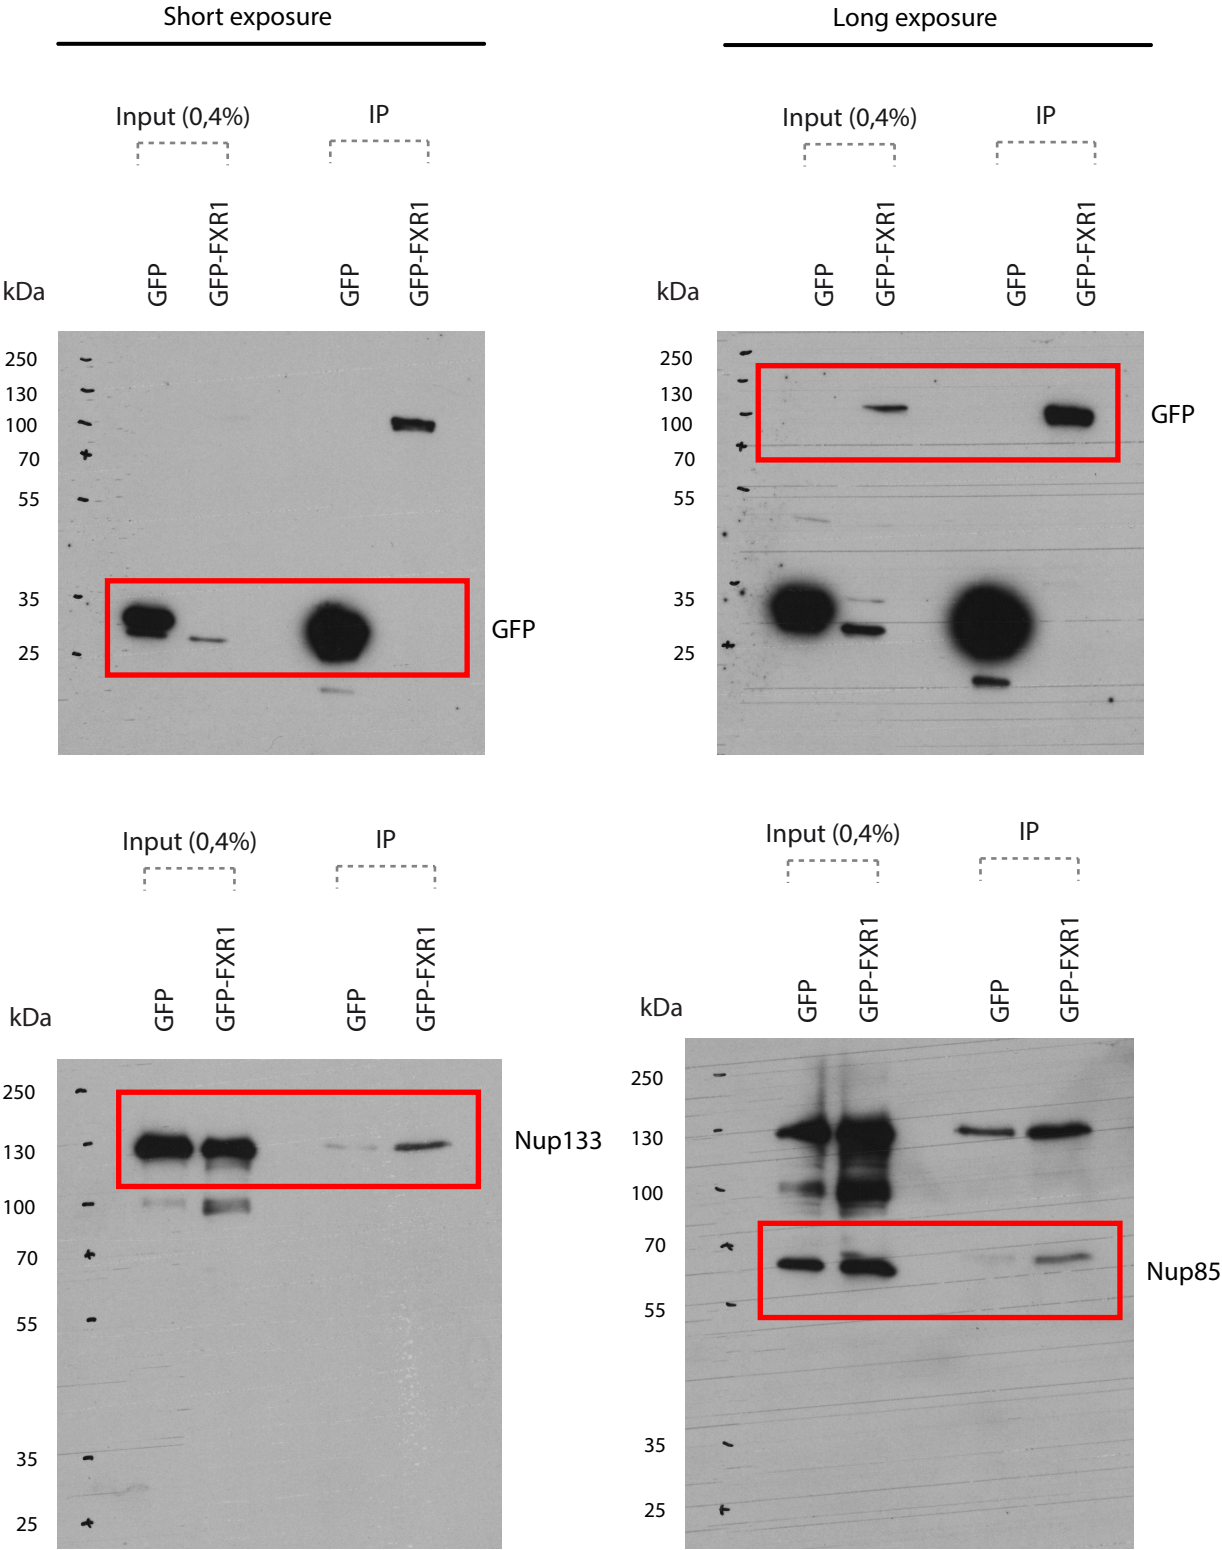

Figure 1B: Lysates of HeLa cells stably expressing GFP alone or 3xGFP-Nup85 were subjected to immunoprecipitation using GFP-Trap beads (GFP-IP) and analysed by Western blot

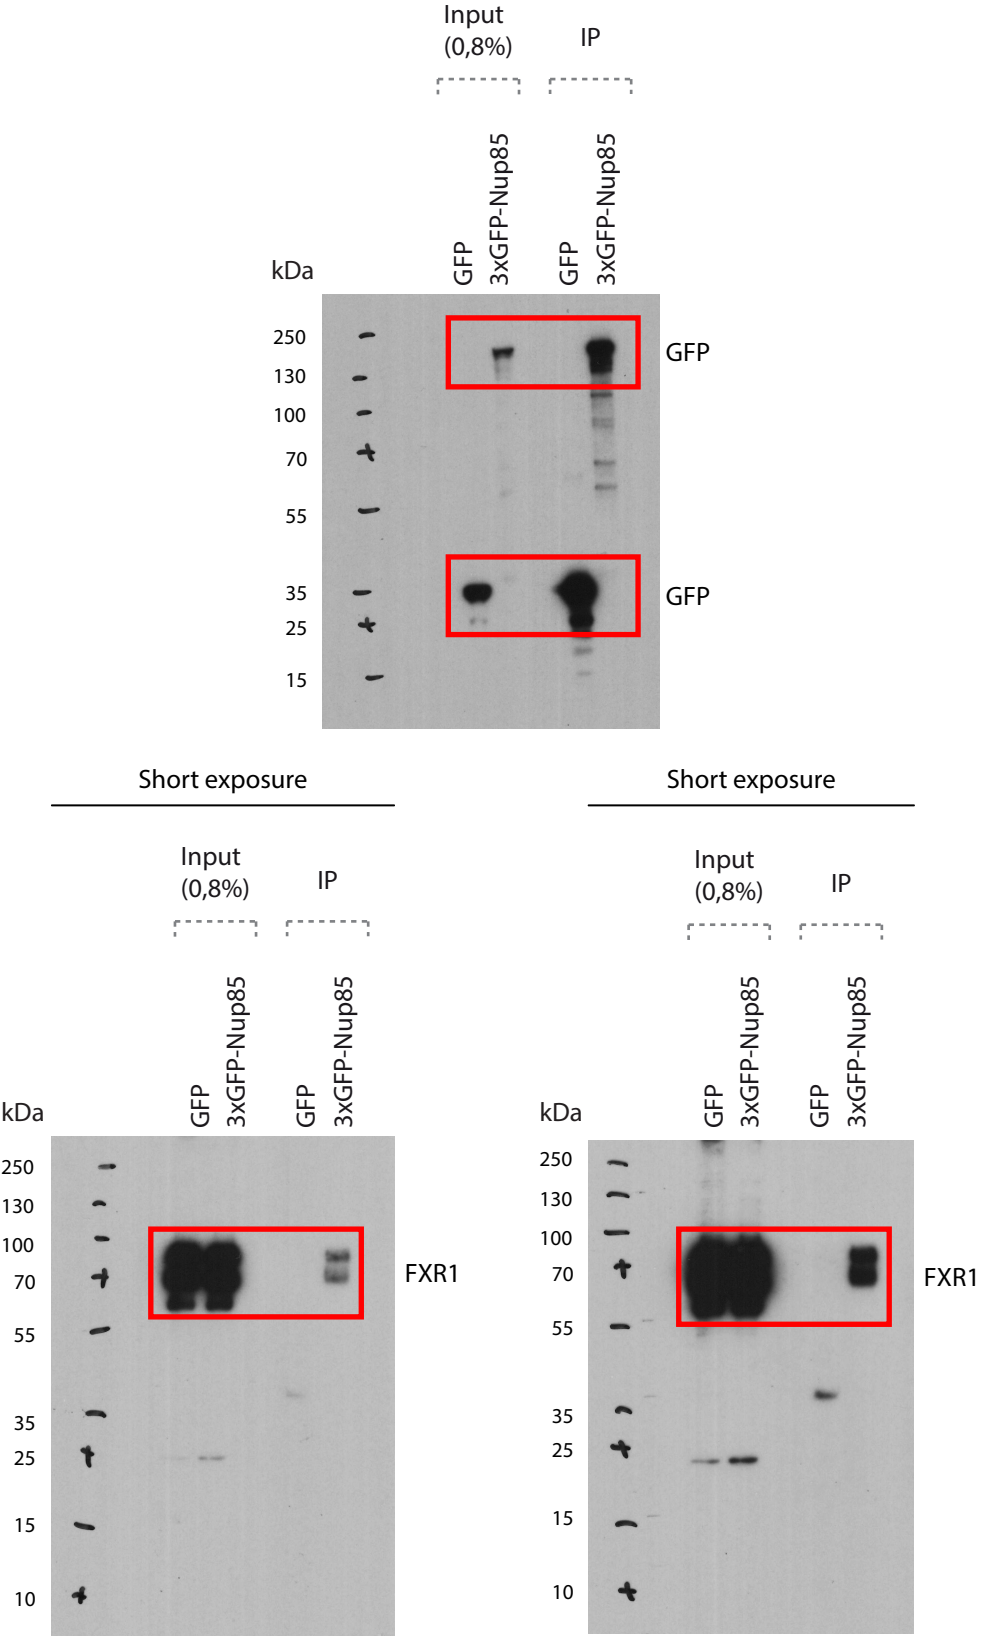

Figure 1C: Immunoprecipitation from HEK293T cell lysates using FXR1 antibody or IgG analysed by Western blotting.

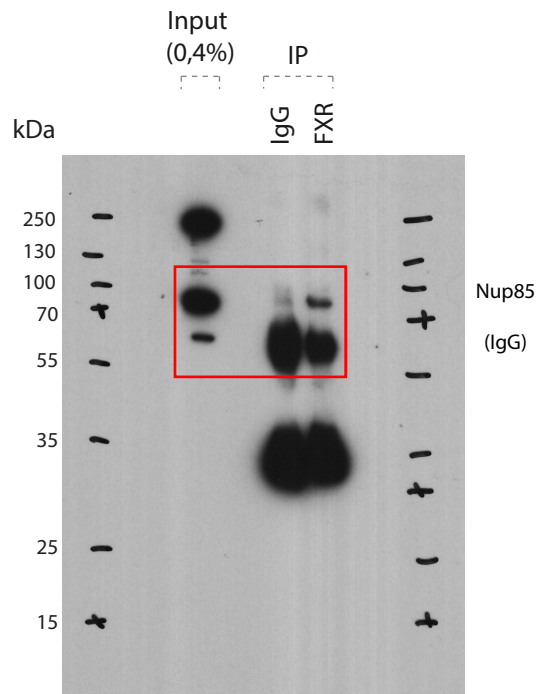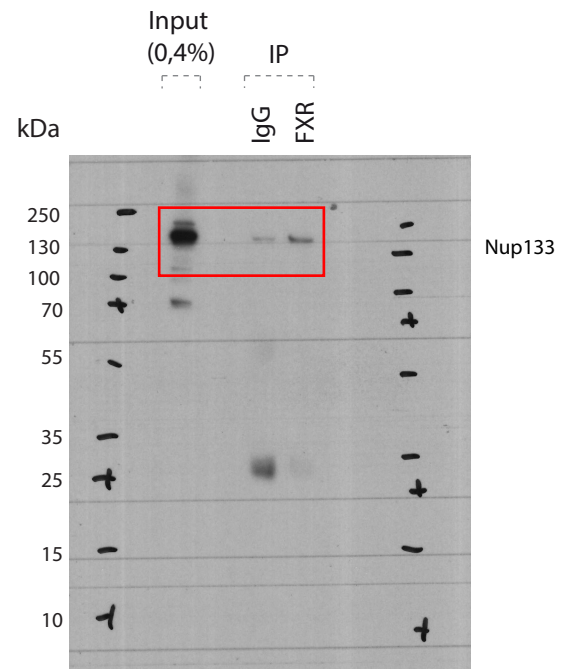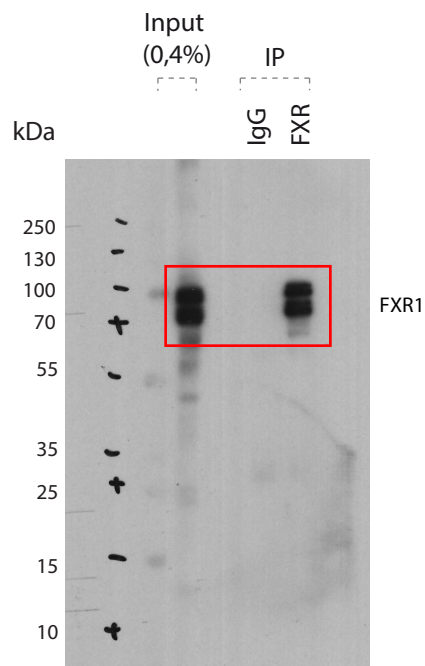

Supplement: EMBJ-39-e104467-s009.pdf [file EMBJ-39-e104467-s009.pdf]
