# Supplementary material for: Spatial control of nucleoporin condensation by fragile X‐related proteins
Source: PubMed Central journal article supplement — EMBO J. 2020 Jul 24;39(20):e104467. doi: 10.15252/embj.2020104467 (PMC7560220; doi:10.15252/embj.2020104467), 2020-07-24

Figure 3B: HeLa cells stably expressing GFP, GFP-FXR1 wild type (WT) and GFP-FXR1 mutated in the sequence recognized by FXR1 siRNA-1 (GFP-FXR1-MUT-siRNA1) were treated with the indicated siRNAs, synchronized by double thymidine block, released for 24 hours and analysed by Western blot.

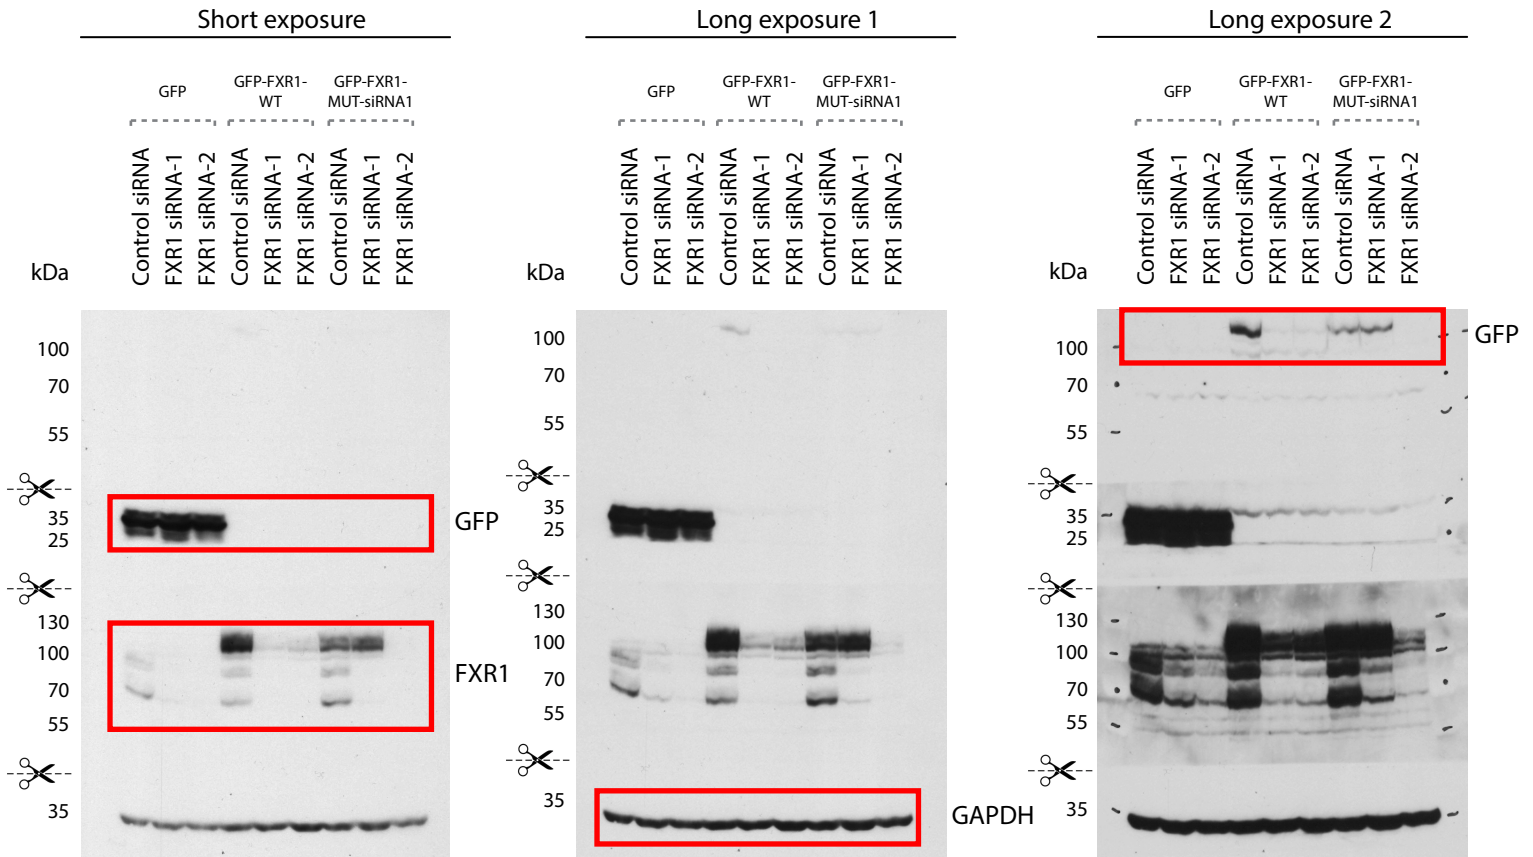

Supplement: EMBJ-39-e104467-s010.pdf [file EMBJ-39-e104467-s010.pdf]
