# Supplementary material for: Spatial control of nucleoporin condensation by fragile X‐related proteins
Source: PubMed Central journal article supplement — EMBO J. 2020 Jul 24;39(20):e104467. doi: 10.15252/embj.2020104467 (PMC7560220; doi:10.15252/embj.2020104467), 2020-07-24

Figure 6A: HeLa cells stably expressing GFP alone or GFP-FXR1 were immunoprecipitated using GFP-Trap beads (GFP-IP), analysed by Western blot.

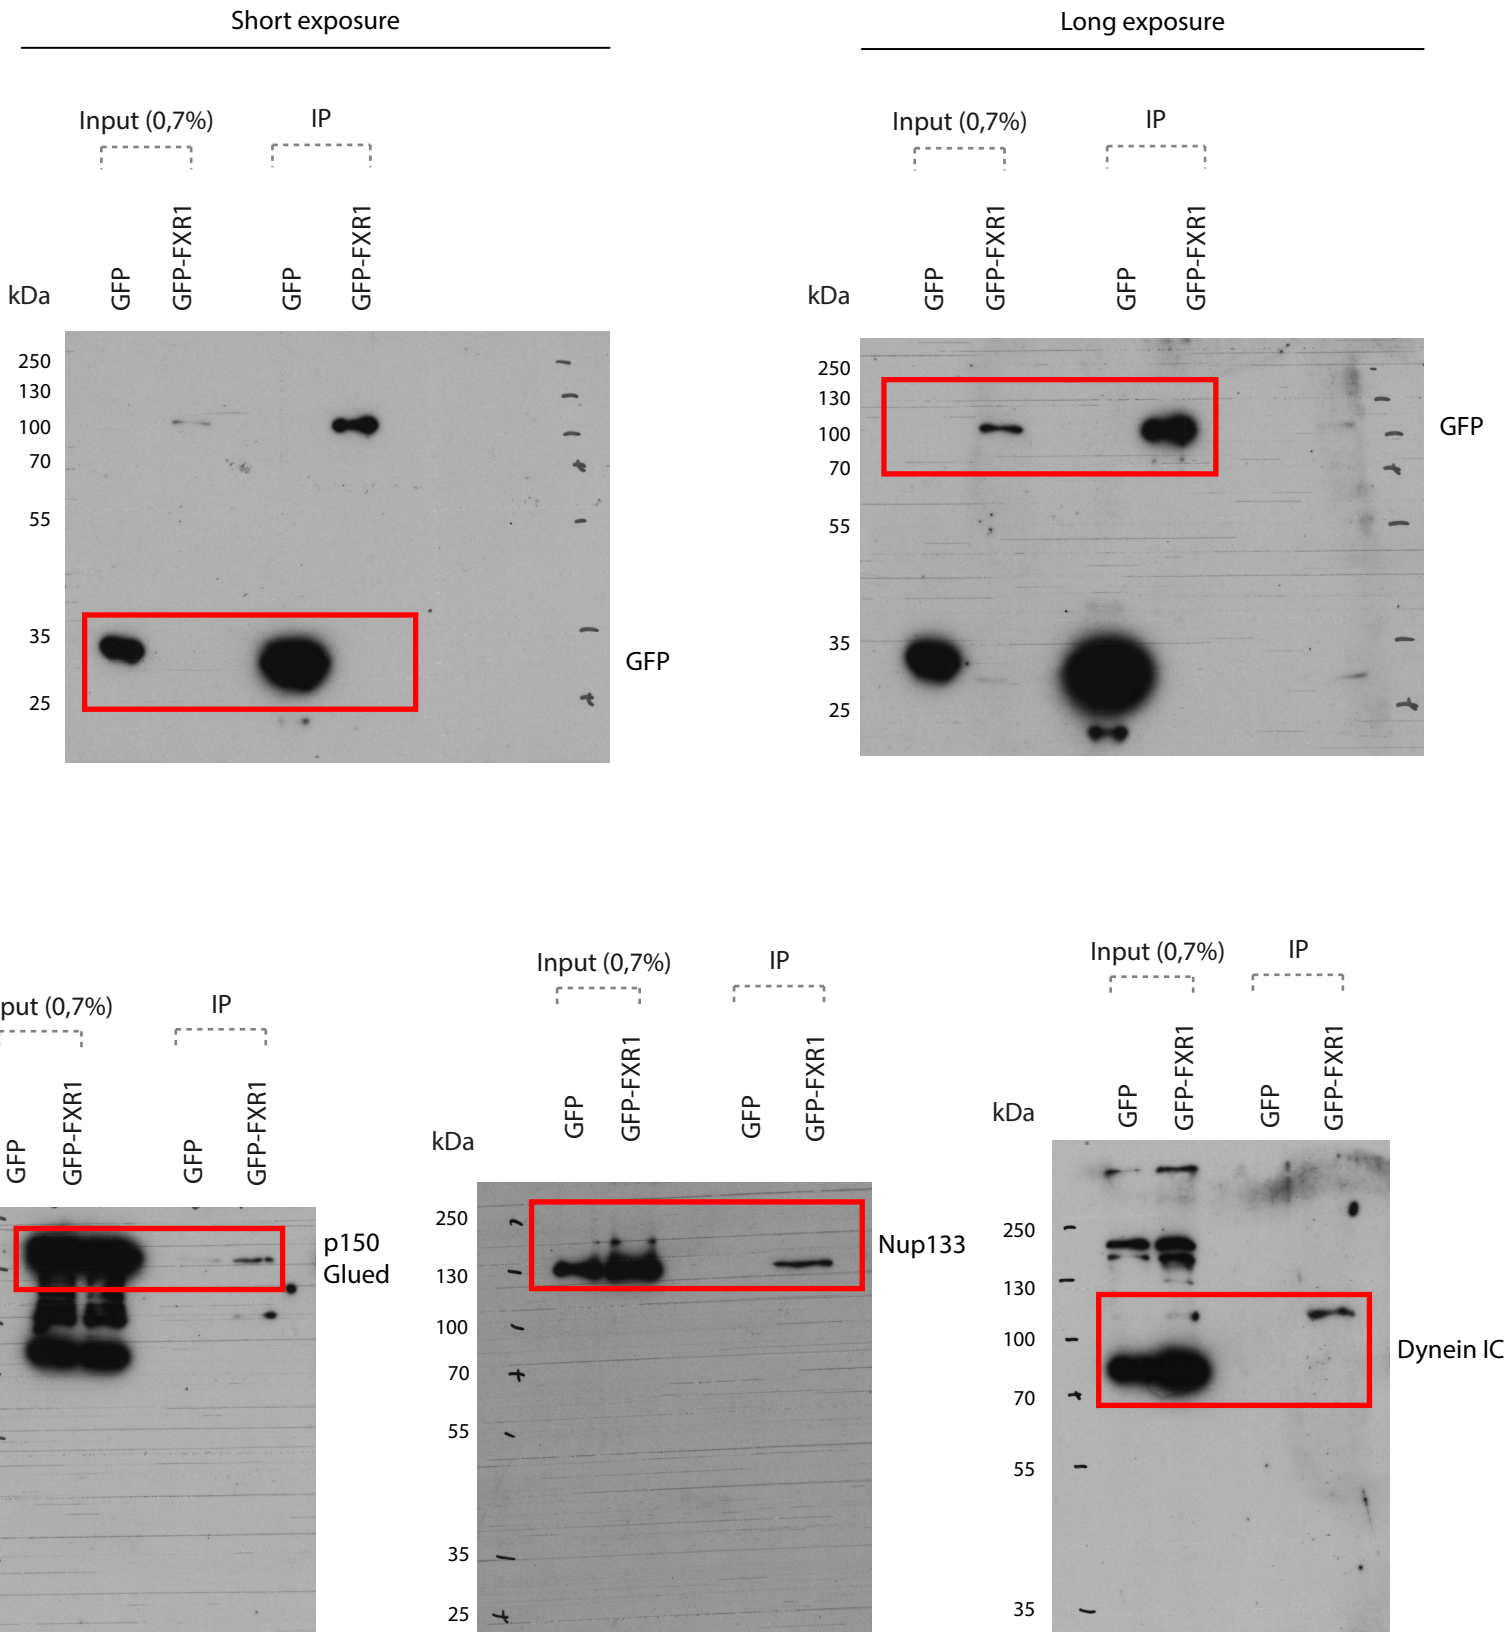

Figure 6D: HLysates of HeLa cells stably expressing GFP alone or GFP-FXR1 were subjected to immunoprecipitation using GFP-Trap beads (GFP-IP), analysed by Western blotting.

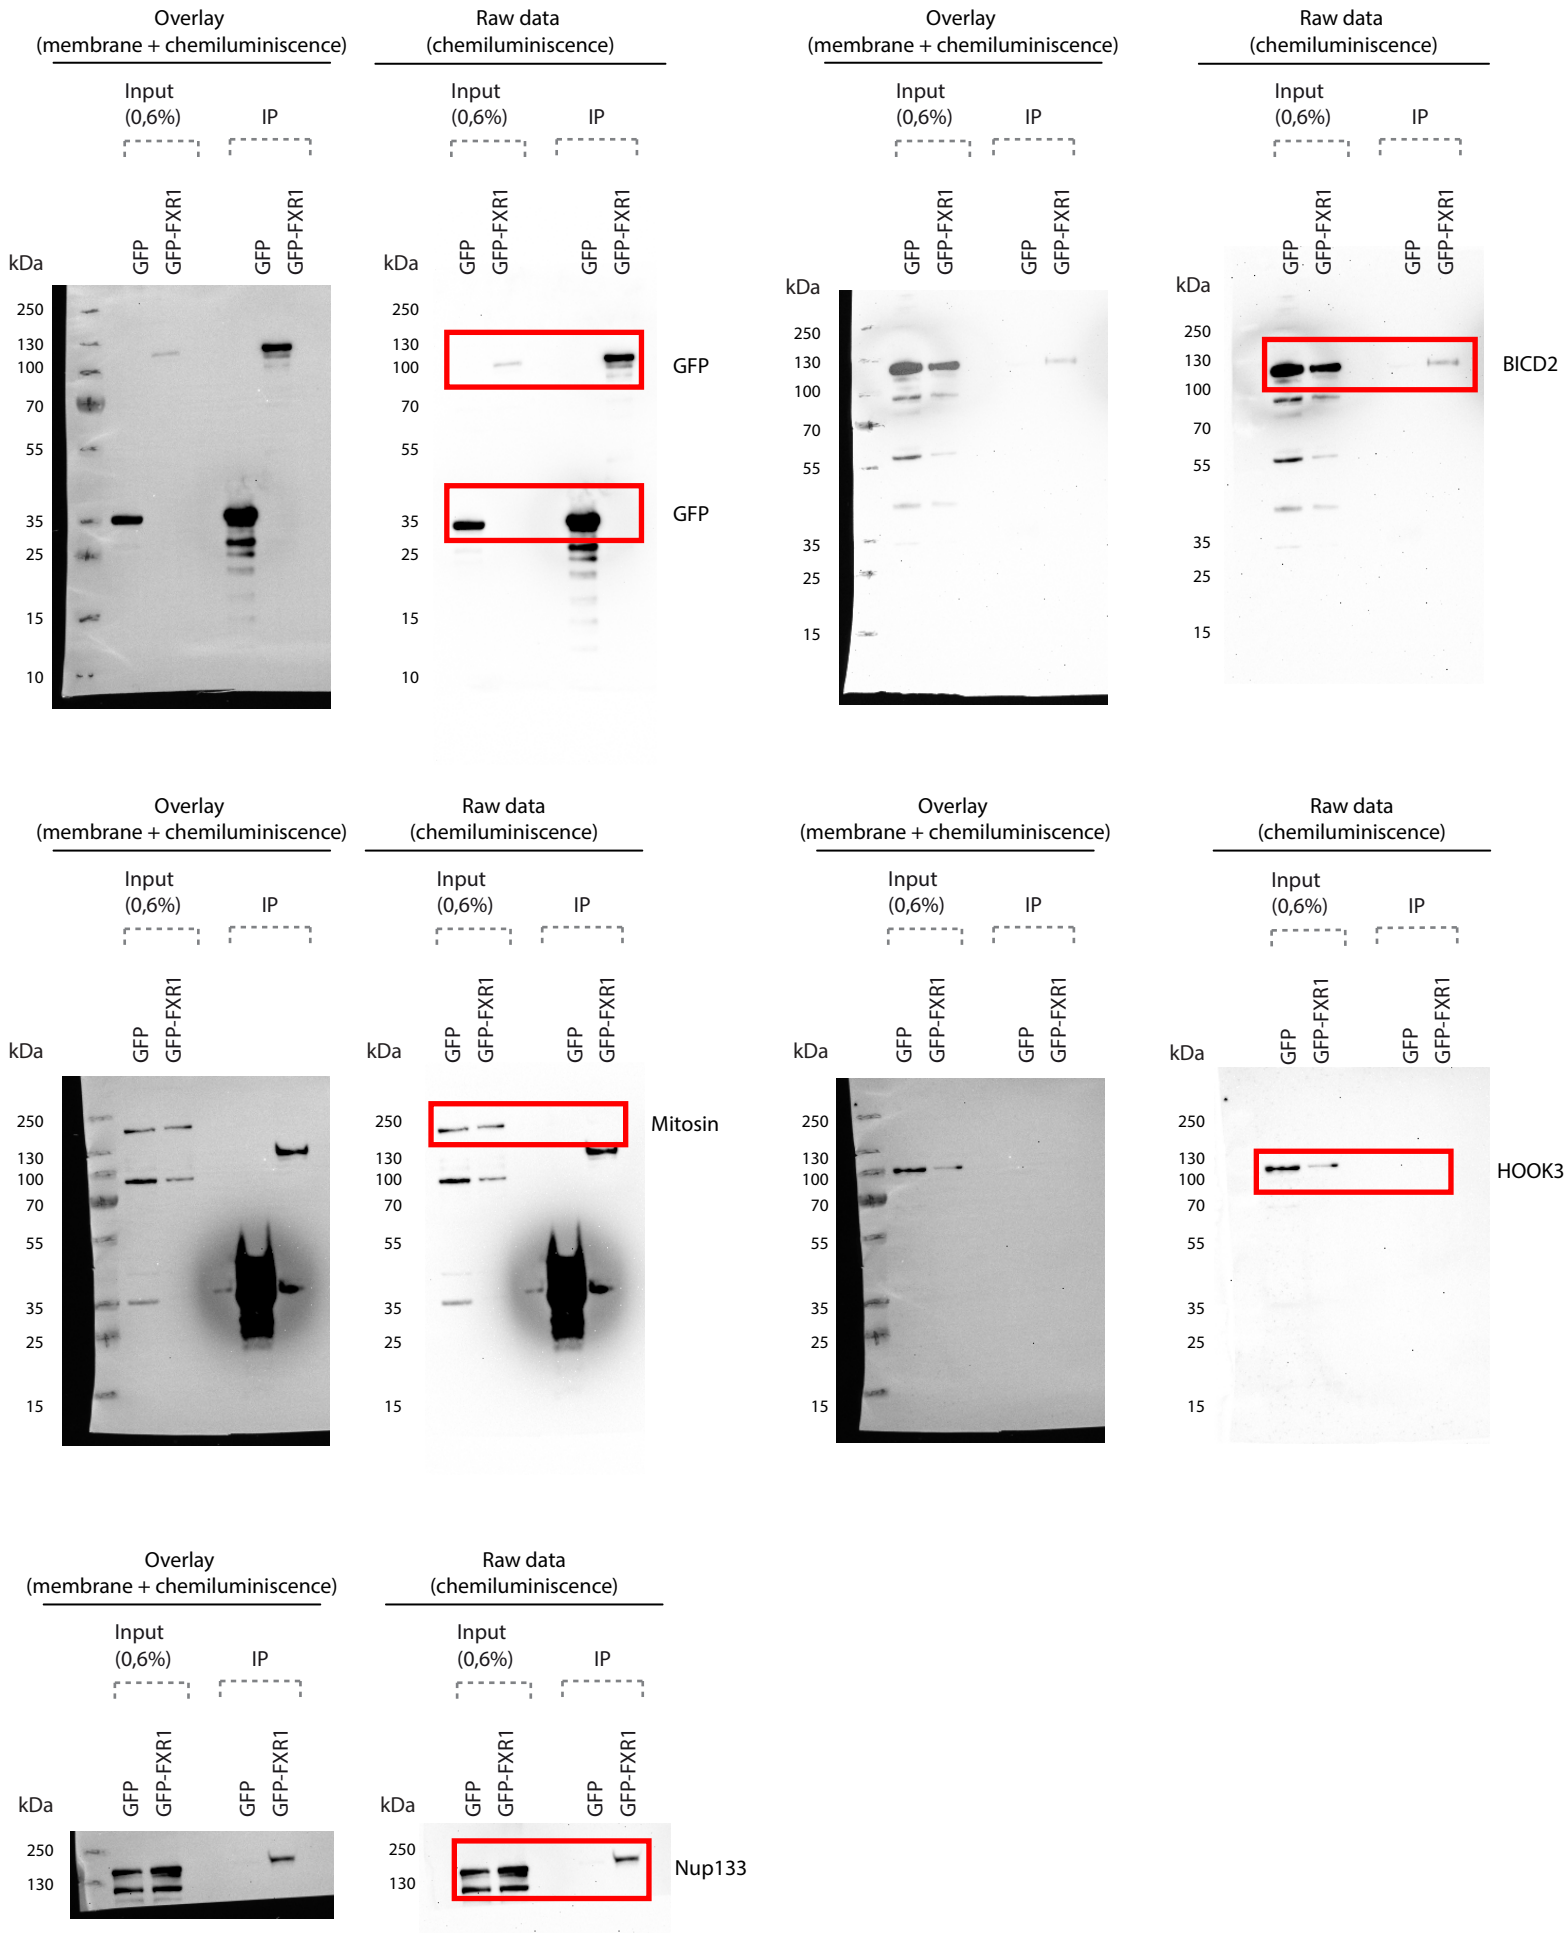

Supplement: EMBJ-39-e104467-s011.pdf [file EMBJ-39-e104467-s011.pdf]
