# Supplementary material for: Spatial control of nucleoporin condensation by fragile X‐related proteins
Source: PubMed Central journal article supplement — EMBO J. 2020 Jul 24;39(20):e104467. doi: 10.15252/embj.2020104467 (PMC7560220; doi:10.15252/embj.2020104467), 2020-07-24

Figure 8A: whole protein extracts from human FXS-patient derived fibroblasts (FXS-1, FXS-2) and control human fibroblasts were subjected to western blotting.

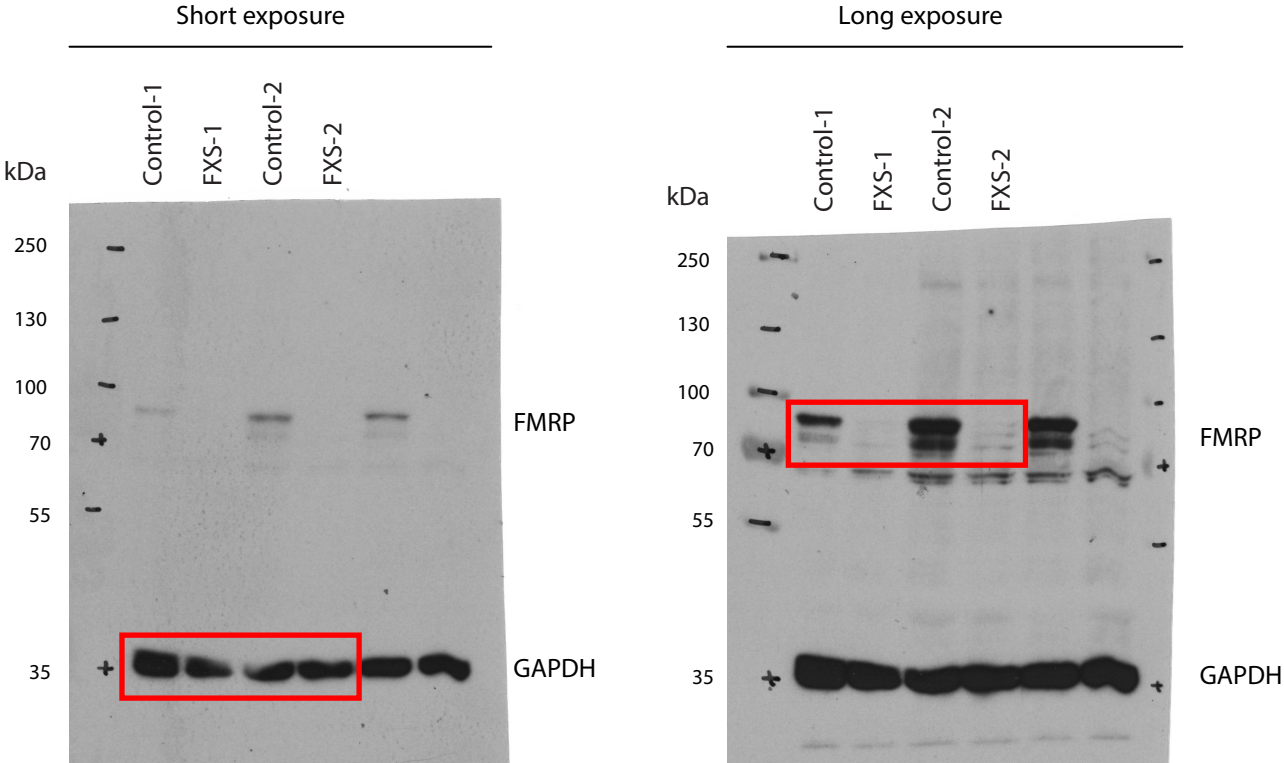

Supplement: EMBJ-39-e104467-s012.pdf [file EMBJ-39-e104467-s012.pdf]
